# Supplementary material for: Are noble gas molecules able to exhibit a superhalogen nature?
Source: Royal Society of Chemistry journal article supplement (doi:10.1039/c6ra21933k), 2016-01-01
Supplement: c6ra21933k1.pdf [file c6ra21933k1.pdf]

## **Are noble gas molecules able to exhibit a superhalogen nature?**

*Celina Sikorska*

Laboratory of Molecular Modeling, Department of Theoretical Chemistry, Faculty of Chemistry,  
University of Gdansk, Wita Stwosza 63, 80-308 Gdansk, Poland

*\*Corresponding author: Celina Sikorska, tel. (+48) 58 523 53 51; E-mail  
celina.sikorska@ug.edu.pl*

### **SUPPLEMENTARY INFORMATION**

**Table ESI.1.** The MP2/6-311++G(3df,3pd)+ECPs geometrical parameters and corresponding harmonic vibrational frequencies (in  $\text{cm}^{-1}$ ) for the transition state connecting the  $\text{KrF}_7^-$  anion and its fragmentation products.

| Species<br>(Symmetry)              | Geometrical parameters                  |                                                   | Vibrational frequencies [ $\text{cm}^{-1}$ ] |                                  |                                  |  |
|------------------------------------|-----------------------------------------|---------------------------------------------------|----------------------------------------------|----------------------------------|----------------------------------|--|
| <b>KrF<sub>7</sub><sup>-</sup></b> | $r(\text{Kr}-\text{F}_{1,4})=1.953$     | $\alpha(\text{F}_1\text{KrF}_5)=79.79$            | $\nu_1=-82$ (a <sub>2</sub> )                | $\nu_7=281$ (a <sub>2</sub> )    | $\nu_{13}=353$ (a <sub>1</sub> ) |  |
| TS                                 | $r(\text{Kr}-\text{F}_5)=1.988$         | $\alpha(\text{F}_1\text{XeF}_6)=75.92$            | $\nu_2=34$ (b <sub>2</sub> )                 | $\nu_8=296$ (a <sub>2</sub> )    | $\nu_{14}=355$ (a <sub>1</sub> ) |  |
| (C <sub>2v</sub> )                 | $r(\text{Kr}-\text{F}_{6,7})=1.989$     | $\alpha(\text{F}_1\text{XeF}_7)=121.96$           | $\nu_3=210$ (a <sub>1</sub> )                | $\nu_9=297$ (b <sub>2</sub> )    | $\nu_{15}=362$ (b <sub>2</sub> ) |  |
|                                    | $\alpha(\text{F}_1\text{KrF}_2)=81.63$  | $\omega(\text{F}_1\text{KrF}_2\text{F}_6)=67.56$  | $\nu_4=224$ (b <sub>1</sub> )                | $\nu_{10}=300$ (b <sub>1</sub> ) | $\nu_{16}=543$ (a <sub>1</sub> ) |  |
|                                    | $\alpha(\text{F}_1\text{KrF}_3)=94.75$  | $\omega(\text{F}_1\text{KrF}_2\text{F}_7)=126.05$ | $\nu_5=262$ (b <sub>2</sub> )                | $\nu_{11}=310$ (b <sub>1</sub> ) | $\nu_{17}=552$ (b <sub>1</sub> ) |  |
|                                    | $\alpha(\text{F}_1\text{KrF}_4)=159.58$ | $\omega(\text{F}_2\text{KrF}_3\text{F}_4)=81.05$  | $\nu_6=274$ (a <sub>1</sub> )                | $\nu_{12}=330$ (a <sub>1</sub> ) | $\nu_{18}=568$ (b <sub>2</sub> ) |  |

Bond lengths ( $r$ ) in Å, valence angles ( $\alpha$ ) and dihedral angles ( $\omega$ ) in degrees.

**Table ESI.2.** The MP2/6-311++G(3df,3pd)+ECPs geometrical parameters and corresponding harmonic vibrational frequencies (in  $\text{cm}^{-1}$ ) for the  $\text{Xe}_2\text{F}_{13}^-$  and  $\text{Rn}_7\text{F}_{13}^-$  anions. The  $E_R$  values (in kcal/mol) stand for the relative energies estimated for the  $\text{Xe}_2\text{F}_{13}^-$  isomers with respect to its corresponding global minimum.

| Species<br>(Symmetry)                                                        | Geometrical<br>parameters                                 | Vibrational frequencies [ $\text{cm}^{-1}$ ]               |                                |                                |                                |                                |
|------------------------------------------------------------------------------|-----------------------------------------------------------|------------------------------------------------------------|--------------------------------|--------------------------------|--------------------------------|--------------------------------|
| <b><math>\text{Xe}_2\text{F}_{13}^-</math></b><br>( $C_2$ )<br>$E_R=0.0$     | $r(\text{Xe}_{1,2}-\text{F}_1)=2.269$                     | $\alpha(\text{F}_1\text{XeF}_4)=73.48$                     | $\nu_1=29$ (b)                 | $\nu_{11}=195$ (a)             | $\nu_{21}=287$ (a)             | $\nu_{31}=479$ (b)             |
|                                                                              | $r(\text{Xe}_1-\text{F}_2)=2.025$                         | $\alpha(\text{F}_4\text{XeF}_5)=84.88$                     | $\nu_2=35$ (a)                 | $\nu_{12}=198$ (b)             | $\nu_{22}=302$ (a)             | $\nu_{32}=511$ (b)             |
|                                                                              | $r(\text{Xe}_1-\text{F}_3)=3.010$                         | $\alpha(\text{F}_4\text{XeF}_6)=76.93$                     | $\nu_3=40$ (a)                 | $\nu_{13}=208$ (a)             | $\nu_{23}=307$ (b)             | $\nu_{33}=523$ (a)             |
|                                                                              | $r(\text{Xe}_{1,2}-\text{F}_4)=1.996$                     | $\alpha(\text{F}_5\text{XeF}_7)=76.81$                     | $\nu_4=66$ (b)                 | $\nu_{14}=211$ (b)             | $\nu_{24}=324$ (b)             | $\nu_{34}=541$ (b)             |
|                                                                              | $r(\text{Xe}_{1,2}-\text{F}_5)=1.946$                     | $\alpha(\text{F}_4\text{XeF}_8)=101.18$                    | $\nu_5=87$ (a)                 | $\nu_{15}=226$ (b)             | $\nu_{25}=335$ (a)             | $\nu_{35}=544$ (a)             |
|                                                                              | $r(\text{Xe}_{1,2}-\text{F}_6)=1.947$                     | $\omega(\text{F}_4\text{XeF}_6\text{F}_7)=172.32$          | $\nu_6=90$ (b)                 | $\nu_{16}=238$ (b)             | $\nu_{26}=355$ (b)             | $\nu_{36}=550$ (a)             |
|                                                                              | $r(\text{Xe}_{1,2}-\text{F}_7)=1.950$                     | $\omega(\text{F}_8\text{XeF}_1\text{F}_5)=176.01$          | $\nu_7=107$ (a)                | $\nu_{17}=246$ (a)             | $\nu_{27}=369$ (a)             | $\nu_{37}=550$ (b)             |
|                                                                              | $r(\text{Xe}_{1,2}-\text{F}_8)=1.979$                     | $\omega(\text{F}_8\text{XeF}_6\text{F}_4)=103.63$          | $\nu_8=116$ (b)                | $\nu_{18}=252$ (b)             | $\nu_{28}=470$ (a)             | $\nu_{38}=570$ (b)             |
| $\alpha(\text{F}_1\text{XeF}_2)=71.52$                                       | $\omega(\text{F}_8\text{XeF}_7\text{F}_4)=99.54$          | $\nu_9=141$ (a)                                            | $\nu_{19}=258$ (a)             | $\nu_{29}=473$ (b)             | $\nu_{39}=575$ (a)             |                                |
|                                                                              |                                                           | $\nu_{10}=161$ (a)                                         | $\nu_{20}=263$ (b)             | $\nu_{30}=478$ (a)             |                                |                                |
| <b><math>\text{Xe}_2\text{F}_{13}^-</math></b><br>( $C_{2v}$ )<br>$E_R=0.3$  | $r(\text{Xe}_1-\text{F}_1)=2.547$                         | $\alpha(\text{F}_1\text{Xe}_2\text{F}_1)=69.83$            | $\nu_1=18$ ( $b_2$ )           | $\nu_{10}=146$ ( $b_2$ )       | $\nu_{20}=285$ (b)             | $\nu_{29}=462$ ( $a_1$ )       |
|                                                                              | $r(\text{Xe}_1-\text{F}_2)=2.006$                         | $\alpha(\text{F}_1\text{Xe}_1\text{F}_2)=70.62$            | $\nu_2=26$ ( $b_2$ )           | $\nu_{11}=160$ ( $b_2$ )       | $\nu_{21}=290$ (b)             | $\nu_{30}=481$ ( $b_1$ )       |
|                                                                              | $r(\text{Xe}_1-\text{F}_3)=1.946$                         | $\alpha(\text{F}_1\text{Xe}_1\text{F}_3)=71.41$            | $\nu_3=47$ ( $b_2$ )           | $\nu_{12}=168$ ( $b_2$ )       | $\nu_{22}=304$ (b)             | $\nu_{31}=482$ ( $a_1$ )       |
|                                                                              | $r(\text{Xe}_1-\text{F}_4)=1.932$                         | $\alpha(\text{F}_3\text{Xe}_1\text{F}_4)=82.48$            | $\nu_4=72$ ( $b_2$ )           | $\nu_{13}=173$ ( $b_2$ )       | $\nu_{23}=331$ ( $b_1$ )       | $\nu_{32}=500$ (d)             |
|                                                                              | $r(\text{Xe}_2-\text{F}_1)=2.093$                         | $\alpha(\text{F}_1\text{Xe}_2\text{F}_5)=90.89$            | $\nu_5=84$ ( $b_2$ )           | $\nu_{14,15}=204$ ( $b_2$ )    | $\nu_{24}=373$ ( $b_2$ )       | $\nu_{33}=527$ (d)             |
|                                                                              | $r(\text{Xe}_2-\text{F}_5)=1.968$                         | $\alpha(\text{F}_5\text{Xe}_2\text{F}_6)=89.69$            | $\nu_6=89$ ( $b_2$ )           | $\nu_{16}=206$ ( $b_2$ )       | $\nu_{25}=384$ ( $a_1$ )       | $\nu_{34}=528$ (d)             |
|                                                                              | $r(\text{Xe}_2-\text{F}_6)=1.996$                         | $\alpha(\text{F}_5\text{Xe}_2\text{F}_7)=88.91$            | $\nu_7=95$ ( $b_2$ )           | $\nu_{17}=222$ ( $b_2$ )       | $\nu_{26}=397$ (c)             | $\nu_{35}=535$ ( $a_1$ )       |
|                                                                              | $r(\text{Xe}_2-\text{F}_7)=1.985$                         | $\omega(\text{F}_1\text{Xe}_1\text{F}_3\text{F}_4)=142.32$ | $\nu_8=123$ ( $b_2$ )          | $\nu_{18}=233$ (a)             | $\nu_{27}=401$ (c)             | $\nu_{36,37}=559$ (d)          |
| $\alpha(\text{F}_1\text{Xe}_1\text{F}_1)=56.11$                              | $\omega(\text{F}_1\text{Xe}_2\text{F}_6\text{F}_5)=91.04$ | $\nu_9=128$ ( $b_2$ )                                      | $\nu_{19}=253$ (a)             | $\nu_{28}=444$ ( $a_1$ )       | $\nu_{38}=575$ (d)             |                                |
|                                                                              |                                                           |                                                            |                                |                                | $\nu_{39}=585$ (d)             |                                |
| <b><math>\text{Xe}_2\text{F}_{13}^-</math></b><br>( $D_{5d}$ )<br>$E_R=18.7$ | $r(\text{Xe}-\text{F}_1)=2.308$                           | $\nu_1=3$ ( $a_{1u}$ )                                     | $\nu_{10}=73$ ( $a_{2u}$ )     | $\nu_{18}=285$ ( $a_{1g}$ )    | $\nu_{26,27}=424$ ( $e_{2g}$ ) | $\nu_{34,35}=540$ ( $e_{1g}$ ) |
|                                                                              | $r(\text{Xe}-\text{F}_2)=1.981$                           | $\nu_{2,3}=18$ ( $e_{1u}$ )                                | $\nu_{11}=77$ ( $a_{1g}$ )     | $\nu_{19}=320$ ( $a_{2u}$ )    | $\nu_{28,29}=474$ ( $e_{2u}$ ) | $\nu_{36,37}=553$ ( $e_{1u}$ ) |
|                                                                              | $r(\text{Xe}-\text{F}_3)=1.865$                           | $\nu_{4,5}=32$ ( $e_{1g}$ )                                | $\nu_{12,13}=95$ ( $e_{1u}$ )  | $\nu_{20,21}=340$ ( $e_{1g}$ ) | $\nu_{30,31}=474$ ( $e_{2g}$ ) | $\nu_{38}=606$ ( $a_{2u}$ )    |
|                                                                              | $\alpha(\text{F}_1\text{XeF}_2)=95.44$                    | $\nu_{6,7}=71$ ( $e_{2u}$ )                                | $\nu_{14,15}=264$ ( $e_{1g}$ ) | $\nu_{22,23}=340$ ( $e_{1u}$ ) | $\nu_{32}=529$ ( $a_{1g}$ )    | $\nu_{39}=618$ ( $a_{1g}$ )    |
|                                                                              | $\alpha(\text{F}_2\text{XeF}_2)=71.62$                    | $\nu_{8,9}=72$ ( $e_{2g}$ )                                | $\nu_{16,17}=265$ ( $e_{1u}$ ) | $\nu_{24,25}=423$ ( $e_{2u}$ ) | $\nu_{33}=538$ ( $a_{2u}$ )    |                                |
|                                                                              | $\omega(\text{F}_1\text{XeF}_2\text{F}_2)=93.94$          |                                                            |                                |                                |                                |                                |
| <b><math>\text{Xe}_2\text{F}_{13}^-</math></b><br>( $D_{5h}$ )<br>$E_R=18.7$ | $r(\text{Xe}-\text{F}_1)=2.308$                           | $\nu_1=5$ (a)                                              | $\nu_{10}=73$ (a)              | $\nu_{18}=285$ (d)             | $\nu_{26,27}=424$ ( $e_{2g}$ ) | $\nu_{34,35}=540$ (b)          |
|                                                                              | $r(\text{Xe}-\text{F}_2)=1.981$                           | $\nu_{2,3}=18$ (b)                                         | $\nu_{11}=77$ (d)              | $\nu_{19}=320$ (a)             | $\nu_{28,29}=474$ (c)          | $\nu_{36,37}=553$ (b)          |
|                                                                              | $r(\text{Xe}-\text{F}_3)=1.865$                           | $\nu_{4,5}=32$ (b)                                         | $\nu_{12,13}=94$ (b)           | $\nu_{20,21}=340$ (b)          | $\nu_{30,31}=475$ (a)          | $\nu_{38}=606$ ( $a_{2u}$ )    |
|                                                                              | $\alpha(\text{F}_1\text{XeF}_2)=95.44$                    | $\nu_{6,7}=70$ (c)                                         | $\nu_{14,15}=264$ (b)          | $\nu_{22,23}=340$ (b)          | $\nu_{32}=529$ (d)             | $\nu_{39}=618$ ( $a_{1g}$ )    |
|                                                                              | $\alpha(\text{F}_2\text{XeF}_2)=71.62$                    | $\nu_{8,9}=73$ (a)                                         | $\nu_{16,17}=265$ (b)          | $\nu_{24,25}=423$ (c)          | $\nu_{33}=538$ (a)             |                                |
|                                                                              | $\omega(\text{F}_1\text{XeF}_2\text{F}_2)=93.94$          |                                                            |                                |                                |                                |                                |

| Species<br>(Symmetry)                                                | Geometrical<br>parameters                                 | Vibrational frequencies [cm <sup>-1</sup> ]               |                         |                          |                          |                             |
|----------------------------------------------------------------------|-----------------------------------------------------------|-----------------------------------------------------------|-------------------------|--------------------------|--------------------------|-----------------------------|
| <b>Rn<sub>2</sub>F<sub>13</sub><sup>-</sup></b><br>(C <sub>2</sub> ) | r(Rn <sub>1,2</sub> -F <sub>1</sub> )= 2.305              | α(F <sub>2</sub> RnF <sub>4</sub> )=87.72                 | ν <sub>1</sub> =7 (b)   | ν <sub>10</sub> =165 (b) | ν <sub>19</sub> =260 (b) | ν <sub>28</sub> =439 (b)    |
|                                                                      | r(Rn <sub>1</sub> -F <sub>2</sub> )= 2.202                | α(F <sub>4</sub> RnF <sub>5</sub> )=84.17                 | ν <sub>2</sub> =27 (a)  | ν <sub>11</sub> =165 (a) | ν <sub>20</sub> =277 (b) | ν <sub>29</sub> =456 (a)    |
|                                                                      | r(Rn <sub>1</sub> -F <sub>3</sub> )= 2.460                | α(F <sub>4</sub> RnF <sub>6</sub> )=78.71                 | ν <sub>3</sub> =72 (a)  | ν <sub>12</sub> =190 (a) | ν <sub>21</sub> =285 (a) | ν <sub>30,31</sub> =518 (a) |
|                                                                      | r(Rn <sub>1,2</sub> -F <sub>4</sub> )= 2.039              | α(F <sub>4</sub> RnF <sub>7</sub> )=94.86                 | ν <sub>4</sub> =80 (b)  | ν <sub>13</sub> =193 (b) | ν <sub>22</sub> =301 (a) | ν <sub>32</sub> =531 (a)    |
|                                                                      | r(Rn <sub>1,2</sub> -F <sub>5</sub> )= 2.034              | α(F <sub>4</sub> RnF <sub>8</sub> )=155.66                | ν <sub>5</sub> =95 (a)  | ν <sub>14</sub> =224 (a) | ν <sub>23</sub> =312 (b) | ν <sub>33</sub> =534 (b)    |
|                                                                      | r(Rn <sub>1,2</sub> -F <sub>6</sub> )= 2.016              | ω(F <sub>4</sub> RnF <sub>2</sub> F <sub>8</sub> )=159.66 | ν <sub>6</sub> =119 (a) | ν <sub>15</sub> =228 (b) | ν <sub>24</sub> =324 (b) | ν <sub>34</sub> =545 (a)    |
|                                                                      | r(Rn <sub>1,2</sub> -F <sub>7</sub> )= 2.038              | ω(F <sub>4</sub> RnF <sub>5</sub> F <sub>8</sub> )=160.71 | ν <sub>7</sub> =127 (b) | ν <sub>16</sub> =246 (b) | ν <sub>25</sub> =333 (a) | ν <sub>35,36</sub> =547 (b) |
|                                                                      | r(Rn <sub>1,2</sub> -F <sub>8</sub> )= 2.049              | ω(F <sub>8</sub> RnF <sub>6</sub> F <sub>4</sub> )=169.42 | ν <sub>8</sub> =144 (a) | ν <sub>17</sub> =248 (a) | ν <sub>26</sub> =351 (b) | ν <sub>37</sub> =560 (a)    |
|                                                                      | α(F <sub>1</sub> RnF <sub>4</sub> )=132.28                | ω(F <sub>8</sub> RnF <sub>7</sub> F <sub>4</sub> )=156.16 | ν <sub>9</sub> =146 (b) | ν <sub>18</sub> =260 (a) | ν <sub>27</sub> =393 (a) | ν <sub>38</sub> =560 (b)    |
|                                                                      | ω(F <sub>8</sub> RnF <sub>1</sub> F <sub>4</sub> )=179.79 |                                                           |                         |                          | ν <sub>39</sub> =563 (a) |                             |

Bond lengths (r) in Å, valence angles (α) and dihedral angles (ω) in degrees.
